# Supplementary material for: Towards Unravelling the Role of ERα-Targeting miRNAs in the Exosome-Mediated Transferring of the Hormone Resistance
Source: MDPI journal article supplement (doi:10.3390/molecules26216661), 2021-11-03
Supplement: s1 [file s1]

# Towards Unravelling the Role of ER $\alpha$ -Targeting miRNAs in the Exosome-Mediated Transferring of the Hormone Resistance

Olga E. Andreeva <sup>1</sup>, Danila V. Sorokin <sup>1</sup>, Ekaterina I. Mikhaevich <sup>1</sup>, Irina V. Bure <sup>2</sup>, Yuri Y. Shchegolev <sup>1</sup>, Marina V. Nemtsova <sup>2</sup>, Margarita V. Gudkova <sup>1</sup>, Alexander M. Scherbakov <sup>1,\*</sup> and Mikhail A. Krasil'nikov <sup>1</sup>

<sup>1</sup> Department of Experimental Tumour Biology, Institute of Carcinogenesis, N.N. Blokhin National Medical Research Center of Oncology of the Ministry of Health of the Russian Federation, 115522 Moscow, Russia; o.andreeva@ronc.ru (O.E.A.); d.sorokin@ronc.ru (D.V.S.); k.mikhaevich@gmail.com (E.I.M.); yurashhegolev@gmail.com (Y.Y.S.); gudkova@ronc.ru (M.V.G.); krasilnikovm1@yandex.ru (M.A.K.)

<sup>2</sup> Laboratory of Medical Genetics, Institute of Molecular Medicine, I.M. Sechenov First Moscow State Medical University, 119991 Moscow, Russia; bureira@mail.ru (I.V.B.); nemtsova\_m\_v@mail.ru (M.V.N.)

\* Correspondence: a.sherbakov@ronc.ru or alex.scherbakov@gmail.com

**Table S1.** MiRNAs hyperexpressed in tamoxifen-resistant cells and their exosomes (in comparison with miRNAs from control exosomes/cells). The **miR-181a-2** entries are highlighted in green.

| miRNAs Hyperexpressed in <u>Exosomes</u> from <u>Tamoxifen-Resistant Cells</u> | miRNAs Hyperexpressed in <u>Tamoxifen-Resistant Cells</u> |
|--------------------------------------------------------------------------------|-----------------------------------------------------------|
| hsa-miR-5196-3p                                                                | hsa-miR-12136                                             |
| hsa-miR-150-5p                                                                 | hsa-miR-200b-5p                                           |
| hsa-miR-6815-5p                                                                | hsa-miR-200a-5p                                           |
| hsa-miR-598-5p                                                                 | hsa-miR-34a-5p                                            |
| hsa-miR-4321                                                                   | hsa-miR-3605-5p                                           |
| hsa-miR-1224-5p                                                                | hsa-miR-30c-5p                                            |
| hsa-miR-1247-5p                                                                | hsa-miR-30c-1-3p                                          |
| hsa-miR-4783-3p                                                                | hsa-miR-186-5p                                            |
| hsa-miR-6892-5p                                                                | hsa-miR-197-3p                                            |
| hsa-miR-3661                                                                   | hsa-miR-197-5p                                            |
| hsa-miR-940                                                                    | hsa-miR-320b                                              |
| hsa-miR-6818-3p                                                                | hsa-miR-9-5p                                              |
| hsa-miR-6781-3p                                                                | hsa-miR-556-5p                                            |
| hsa-miR-4540                                                                   | hsa-miR-181b-5p                                           |
| hsa-miR-1246                                                                   | hsa-miR-181b-3p                                           |
| hsa-miR-425-5p                                                                 | hsa-miR-181a-5p                                           |
| hsa-miR-4700-3p                                                                | hsa-miR-181a-3p                                           |
| hsa-miR-3606-3p                                                                | hsa-miR-29b-3p                                            |
| hsa-miR-3651                                                                   | hsa-miR-664a-3p                                           |
| hsa-miR-1247-3p                                                                | hsa-miR-3155b                                             |
| hsa-miR-6075                                                                   | hsa-miR-4676-3p                                           |
| hsa-miR-4784                                                                   | hsa-miR-146b-5p                                           |
| hsa-miR-4431                                                                   | hsa-miR-2110                                              |
| hsa-miR-6506-3p                                                                | hsa-miR-378c                                              |

|                  |                  |
|------------------|------------------|
| hsa-miR-4763-5p  | hsa-miR-210-3p   |
| hsa-miR-1251-3p  | hsa-miR-1237-3p  |
| hsa-miR-4285     | hsa-miR-139-3p   |
| hsa-miR-4445-3p  | hsa-miR-708-5p   |
| hsa-miR-6876-3p  | hsa-miR-708-3p   |
| hsa-miR-4682     | hsa-miR-141-5p   |
| hsa-miR-579-3p   | hsa-miR-1293     |
| hsa-miR-187-5p   | hsa-miR-196a-5p  |
| hsa-miR-509-3p   | hsa-miR-618      |
| hsa-miR-4632-3p  | hsa-miR-3059-5p  |
| hsa-miR-6731-3p  | hsa-miR-331-5p   |
| hsa-miR-1245b-5p | hsa-miR-331-3p   |
| hsa-miR-124-5p   | hsa-miR-15a-5p   |
| hsa-miR-619-5p   | hsa-miR-17-5p    |
| hsa-miR-25-5p    | hsa-miR-17-3p    |
| hsa-miR-329-3p   | hsa-miR-20a-5p   |
| hsa-miR-1915-5p  | hsa-miR-625-5p   |
| hsa-miR-4290     | hsa-miR-625-3p   |
| hsa-miR-607      | hsa-miR-337-3p   |
| hsa-miR-146b-3p  | hsa-miR-431-3p   |
| hsa-miR-548as-3p | hsa-miR-379-5p   |
| hsa-miR-3940-3p  | hsa-miR-381-3p   |
| hsa-miR-4469     | hsa-miR-655-3p   |
| hsa-miR-4695-3p  | hsa-miR-134-5p   |
| hsa-miR-1292-5p  | hsa-miR-1266-5p  |
| hsa-miR-656-3p   | hsa-miR-629-5p   |
| hsa-miR-199a-5p  | hsa-miR-629-3p   |
| hsa-miR-4733-5p  | hsa-miR-1276     |
| hsa-miR-4762-5p  | hsa-miR-3177-3p  |
| hsa-miR-4771     | hsa-miR-193b-5p  |
| hsa-miR-1237-5p  | hsa-miR-193b-3p  |
| hsa-miR-6790-3p  | hsa-miR-365a-3p  |
| hsa-miR-127-3p   | hsa-miR-365a-5p  |
| hsa-miR-203a-3p  | hsa-miR-6511a-5p |
| hsa-miR-1295a    | hsa-miR-6770-3p  |
| hsa-miR-154-5p   | hsa-miR-4721     |
| hsa-miR-3180-5p  | hsa-miR-140-3p   |
| hsa-miR-193b-5p  | hsa-miR-3182     |
| hsa-miR-4638-3p  | hsa-miR-22-5p    |
| hsa-miR-5688     | hsa-miR-22-3p    |
| hsa-miR-574-3p   | hsa-miR-324-5p   |
| hsa-miR-7107-3p  | hsa-miR-324-3p   |
| hsa-miR-193b-3p  | hsa-miR-4521     |
| hsa-miR-6769b-3p | hsa-miR-744-3p   |
| hsa-miR-6819-5p  | hsa-miR-33b-3p   |
| hsa-miR-4689     | hsa-miR-193a-5p  |
| hsa-miR-6501-3p  | hsa-miR-193a-3p  |
| hsa-miR-5006-5p  | hsa-miR-365b-3p  |

|                   |                  |
|-------------------|------------------|
| hsa-miR-6071      | hsa-miR-152-3p   |
| hsa-miR-4426      | hsa-miR-6785-5p  |
| hsa-miR-3613-3p   | hsa-miR-6516-5p  |
| hsa-miR-7847-3p   | hsa-miR-99b-3p   |
| hsa-miR-4485-3p   | hsa-let-7e-5p    |
| hsa-miR-4654      | hsa-miR-125a-3p  |
| hsa-miR-23a-5p    | hsa-miR-3127-3p  |
| hsa-miR-203b-5p   | hsa-miR-128-3p   |
| hsa-miR-4791      | hsa-miR-128-1-5p |
| hsa-miR-1225-3p   | hsa-miR-1246     |
| hsa-miR-1254      | hsa-miR-5001-5p  |
| hsa-miR-6757-5p   | hsa-miR-663a     |
| hsa-miR-7973      | hsa-miR-548o-3p  |
| hsa-miR-1470      | hsa-miR-1914-5p  |
| hsa-miR-1343-3p   | hsa-miR-185-5p   |
| hsa-miR-378f      | hsa-miR-1306-5p  |
| hsa-miR-4651      | hsa-miR-301b-3p  |
| hsa-miR-6865-3p   | hsa-miR-130b-5p  |
| hsa-miR-7113-3p   | hsa-miR-130b-3p  |
| hsa-miR-548aw     | hsa-miR-3200-3p  |
| hsa-miR-6840-3p   | hsa-miR-3909     |
| hsa-miR-4417      | hsa-miR-33a-3p   |
| hsa-miR-766-3p    | hsa-miR-548ay-3p |
| hsa-miR-6861-5p   | hsa-miR-26a-1-3p |
| hsa-miR-3141      | hsa-miR-1226-5p  |
| hsa-miR-6803-3p   | hsa-miR-7976     |
| hsa-miR-6511b-3p  | hsa-miR-573      |
| hsa-miR-4486      | hsa-miR-574-3p   |
| hsa-miR-761       | hsa-miR-4449     |
| hsa-miR-4800-5p   | hsa-miR-576-5p   |
| hsa-miR-412-3p    | hsa-miR-3139     |
| hsa-miR-151a-5p   | hsa-miR-579-5p   |
| hsa-miR-6512-3p   | hsa-miR-143-3p   |
| hsa-miR-4754      | hsa-miR-340-3p   |
| hsa-miR-323a-5p   | hsa-miR-3691-5p  |
| hsa-miR-219a-1-3p | hsa-miR-3143     |
| hsa-miR-4729      | hsa-miR-877-5p   |
| hsa-miR-2277-3p   | hsa-miR-4640-5p  |
| hsa-miR-645       | hsa-miR-3934-5p  |
| hsa-miR-6797-3p   | hsa-miR-1275     |
| hsa-miR-501-5p    | hsa-miR-7111-3p  |
| hsa-miR-378j      | hsa-miR-30c-2-3p |
| hsa-miR-7977      | hsa-miR-30a-5p   |
| hsa-miR-498       | hsa-miR-30a-3p   |
| hsa-miR-3184-5p   | hsa-miR-589-5p   |
| hsa-miR-492       | hsa-miR-590-3p   |
| hsa-miR-506-5p    | hsa-miR-10525-3p |
| hsa-miR-7110-3p   | hsa-miR-653-5p   |

|                   |                   |
|-------------------|-------------------|
| hsa-miR-4659a-3p  | hsa-miR-653-3p    |
| hsa-miR-325       | hsa-miR-4652-5p   |
| hsa-miR-933       | hsa-miR-597-3p    |
| hsa-miR-4787-3p   | hsa-miR-320a-3p   |
| hsa-miR-3940-5p   | hsa-miR-6847-5p   |
| hsa-miR-4690-5p   | hsa-miR-491-5p    |
| hsa-miR-4756-3p   | hsa-let-7f-1-3p   |
| hsa-miR-1208      | hsa-miR-181a-2-3p |
| hsa-miR-7152-3p   | hsa-miR-3911      |
| hsa-miR-554       | hsa-miR-4669      |
| hsa-miR-6763-5p   | hsa-miR-532-5p    |
| hsa-miR-6798-5p   | hsa-miR-500b-5p   |
| hsa-miR-1291      | hsa-miR-660-5p    |
| hsa-miR-181a-2-3p | hsa-miR-98-3p     |
| hsa-miR-210-5p    | hsa-let-7f-2-3p   |
| hsa-miR-767-5p    | hsa-miR-421       |
| hsa-miR-6088      | hsa-miR-374a-3p   |
| hsa-miR-27b-5p    | hsa-miR-361-3p    |
| hsa-miR-4731-3p   | hsa-miR-652-3p    |
| hsa-miR-1249-5p   | hsa-miR-652-5p    |
| hsa-miR-1910-5p   | hsa-miR-450b-5p   |
| hsa-miR-612       | hsa-miR-450a-5p   |
| hsa-miR-874-5p    | hsa-miR-542-3p    |
| hsa-miR-6889-5p   | hsa-miR-424-5p    |
| hsa-miR-4745-3p   | hsa-miR-664b-3p   |
| hsa-miR-4655-5p   |                   |
| hsa-miR-543       |                   |
| hsa-miR-2861      |                   |
| hsa-miR-1229-5p   |                   |
| hsa-miR-6850-3p   |                   |
| hsa-miR-3622a-3p  |                   |
| hsa-miR-5091      |                   |
| hsa-miR-1236-3p   |                   |
| hsa-miR-5007-3p   |                   |
| hsa-miR-4655-3p   |                   |
| hsa-miR-7158-5p   |                   |
| hsa-miR-139-5p    |                   |
| hsa-miR-652-5p    |                   |
| hsa-miR-142-3p    |                   |
| hsa-miR-4793-5p   |                   |
| hsa-miR-2276-3p   |                   |
| hsa-miR-4505      |                   |
| hsa-miR-7846-3p   |                   |
| hsa-miR-4777-3p   |                   |
| hsa-miR-4501      |                   |
| hsa-miR-4738-3p   |                   |
| hsa-miR-4267      |                   |
| hsa-miR-4665-5p   |                   |

|                  |  |
|------------------|--|
| hsa-miR-7702     |  |
| hsa-miR-7107-5p  |  |
| hsa-miR-4687-3p  |  |
| hsa-miR-3189-5p  |  |
| hsa-miR-8063     |  |
| hsa-miR-3064-5p  |  |
| hsa-miR-431-3p   |  |
| hsa-miR-7855-5p  |  |
| hsa-miR-3155a    |  |
| hsa-miR-510-5p   |  |
| hsa-miR-127-5p   |  |
| hsa-miR-4482-3p  |  |
| hsa-miR-4743-3p  |  |
| hsa-miR-4722-5p  |  |
| hsa-miR-6771-5p  |  |
| hsa-miR-639      |  |
| hsa-miR-6892-3p  |  |
| hsa-miR-6756-5p  |  |
| hsa-miR-6880-5p  |  |
| hsa-miR-6872-3p  |  |
| hsa-miR-6715a-3p |  |
| hsa-miR-330-5p   |  |
| hsa-miR-4524a-5p |  |
| hsa-miR-3680-3p  |  |
| hsa-miR-3136-5p  |  |
| hsa-miR-4647     |  |
| hsa-miR-4696     |  |
| hsa-miR-7848-3p  |  |
| hsa-miR-6758-5p  |  |
| hsa-miR-4714-5p  |  |
| hsa-miR-4260     |  |
| hsa-miR-6777-5p  |  |
| hsa-miR-6895-3p  |  |
| hsa-miR-6741-5p  |  |
| hsa-miR-7108-3p  |  |
| hsa-miR-762      |  |
| hsa-miR-4684-3p  |  |
| hsa-miR-4436b-5p |  |
| hsa-miR-4749-5p  |  |
| hsa-miR-3180-3p  |  |
| hsa-miR-6812-3p  |  |
| hsa-miR-5088-3p  |  |
| hsa-miR-3177-3p  |  |
| hsa-miR-4304     |  |
| hsa-miR-1286     |  |
| hsa-miR-6744-5p  |  |
| hsa-miR-6125     |  |
| hsa-miR-8060     |  |

|                  |  |
|------------------|--|
| hsa-miR-1227-5p  |  |
| hsa-miR-4732-3p  |  |
| hsa-miR-1287-3p  |  |
| hsa-miR-3194-5p  |  |
| hsa-miR-1471     |  |
| hsa-miR-1281     |  |
| hsa-miR-647      |  |
| hsa-miR-1909-3p  |  |
| hsa-miR-618      |  |
| hsa-miR-5088-5p  |  |
| hsa-miR-6739-3p  |  |
| hsa-miR-8056     |  |
| hsa-miR-3659     |  |
| hsa-miR-648      |  |
| hsa-miR-3687     |  |
| hsa-miR-28-3p    |  |
| hsa-miR-6770-3p  |  |
| hsa-miR-7153-3p  |  |
| hsa-miR-4532     |  |
| hsa-miR-1273g-3p |  |
| hsa-miR-590-5p   |  |
| hsa-miR-3610     |  |
| hsa-miR-4539     |  |
| hsa-miR-4661-5p  |  |
| hsa-miR-219b-5p  |  |
| hsa-miR-4327     |  |
| hsa-miR-551a     |  |
| hsa-miR-6843-3p  |  |
| hsa-miR-1914-3p  |  |
| hsa-miR-6839-5p  |  |
| hsa-miR-126-3p   |  |
| hsa-miR-1231     |  |
| hsa-miR-4687-5p  |  |
| hsa-miR-6749-3p  |  |
| hsa-miR-3944-3p  |  |
| hsa-miR-411-3p   |  |
| hsa-miR-4458     |  |
| hsa-miR-223-3p   |  |
| hsa-miR-1292-3p  |  |
| hsa-miR-4322     |  |
| hsa-miR-548ba    |  |
| hsa-miR-4671-5p  |  |
| hsa-miR-6781-5p  |  |
| hsa-miR-4685-3p  |  |
| hsa-miR-611      |  |
| hsa-miR-146b-5p  |  |
| hsa-miR-4314     |  |
| hsa-miR-4656     |  |

|                  |  |
|------------------|--|
| hsa-miR-6801-3p  |  |
| hsa-miR-4658     |  |
| hsa-miR-1263     |  |
| hsa-miR-3127-3p  |  |
| hsa-miR-4703-5p  |  |
| hsa-miR-5008-3p  |  |
| hsa-miR-6765-3p  |  |
| hsa-miR-7150     |  |
| hsa-miR-7155-3p  |  |
| hsa-miR-423-3p   |  |
| hsa-miR-4695-5p  |  |
| hsa-miR-6869-5p  |  |
| hsa-miR-6819-3p  |  |
| hsa-miR-4511     |  |
| hsa-miR-6778-5p  |  |
| hsa-miR-638      |  |
| hsa-miR-6126     |  |
| hsa-miR-4800-3p  |  |
| hsa-miR-8055     |  |
| hsa-miR-770-5p   |  |
| hsa-miR-3664-5p  |  |
| hsa-miR-6719-3p  |  |
| hsa-miR-6774-5p  |  |
| hsa-miR-296-3p   |  |
| hsa-miR-4667-3p  |  |
| hsa-miR-6886-3p  |  |
| hsa-miR-1180-5p  |  |
| hsa-miR-320a     |  |
| hsa-miR-34a-5p   |  |
| hsa-miR-593-5p   |  |
| hsa-miR-6847-5p  |  |
| hsa-miR-99b-3p   |  |
| hsa-miR-4792     |  |
| hsa-miR-4288     |  |
| hsa-miR-4734     |  |
| hsa-miR-4449     |  |
| hsa-miR-4999-5p  |  |
| hsa-miR-6860     |  |
| hsa-miR-6516-5p  |  |
| hsa-miR-6775-5p  |  |
| hsa-miR-4781-5p  |  |
| hsa-miR-671-3p   |  |
| hsa-miR-654-5p   |  |
| hsa-miR-6769b-5p |  |
| hsa-miR-6754-3p  |  |
| hsa-miR-6724-5p  |  |
| hsa-miR-4470     |  |
| hsa-miR-6748-5p  |  |

|                  |  |
|------------------|--|
| hsa-miR-3150a-3p |  |
| hsa-miR-489-3p   |  |
| hsa-miR-892c-3p  |  |
| hsa-miR-6090     |  |
| hsa-miR-6510-5p  |  |
| hsa-miR-6720-3p  |  |
| hsa-miR-494-5p   |  |
| hsa-miR-661      |  |
| hsa-miR-4758-5p  |  |
| hsa-miR-6513-5p  |  |
| hsa-miR-7114-5p  |  |
| hsa-miR-3178     |  |
| hsa-miR-500b-3p  |  |
| hsa-miR-2115-3p  |  |
| hsa-miR-6891-5p  |  |
| hsa-miR-4741     |  |
| hsa-miR-5002-5p  |  |
| hsa-miR-6068     |  |
| hsa-miR-636      |  |
| hsa-miR-3124-5p  |  |
| hsa-miR-4707-3p  |  |
| hsa-miR-874-3p   |  |
| hsa-miR-4462     |  |
| hsa-miR-3190-3p  |  |
| hsa-miR-6729-5p  |  |
| hsa-miR-564      |  |
| hsa-miR-3615     |  |
| hsa-miR-3908     |  |
| hsa-miR-6082     |  |
| hsa-miR-149-3p   |  |
| hsa-miR-1200     |  |
| hsa-miR-6743-5p  |  |
| hsa-miR-3196     |  |
| hsa-miR-92a-3p   |  |
| hsa-miR-4649-5p  |  |
| hsa-miR-3193     |  |
| hsa-miR-6814-3p  |  |
| hsa-miR-3607-3p  |  |
| hsa-miR-3591-5p  |  |
| hsa-miR-663b     |  |
| hsa-miR-4739     |  |
| hsa-miR-193a-5p  |  |
| hsa-miR-6816-5p  |  |
| hsa-miR-6875-5p  |  |
| hsa-miR-4665-3p  |  |
| hsa-miR-718      |  |
| hsa-miR-320d     |  |
| hsa-miR-4797-3p  |  |



|                   |  |
|-------------------|--|
| hsa-miR-8485      |  |
| hsa-miR-1180-3p   |  |
| hsa-miR-6836-3p   |  |
| hsa-miR-1205      |  |
| hsa-miR-6789-5p   |  |
| hsa-miR-105-5p    |  |
| hsa-miR-6789-3p   |  |
| hsa-miR-4252      |  |
| hsa-miR-514b-5p   |  |
| hsa-miR-4633-3p   |  |
| hsa-miR-6722-3p   |  |
| hsa-miR-3183      |  |
| hsa-miR-4787-5p   |  |
| hsa-miR-6751-3p   |  |
| hsa-miR-4530      |  |
| hsa-miR-508-5p    |  |
| hsa-miR-216a-3p   |  |
| hsa-miR-1343-5p   |  |
| hsa-miR-6764-5p   |  |
| hsa-miR-4785      |  |
| hsa-miR-6786-5p   |  |
| hsa-miR-548as-5p  |  |
| hsa-miR-1908-5p   |  |
| hsa-miR-520a-3p   |  |
| hsa-miR-1268a     |  |
| hsa-miR-939-5p    |  |
| hsa-miR-7151-5p   |  |
| hsa-miR-6765-5p   |  |
| hsa-miR-3185      |  |
| hsa-miR-4257      |  |
| hsa-miR-1228-5p   |  |
| hsa-miR-4634      |  |
| hsa-miR-6805-5p   |  |
| hsa-miR-382-3p    |  |
| hsa-miR-1273h-3p  |  |
| hsa-miR-7704      |  |
| hsa-miR-4707-5p   |  |
| hsa-miR-6087      |  |
| hsa-miR-3151-3p   |  |
| hsa-miR-6753-3p   |  |
| hsa-miR-6726-5p   |  |
| hsa-miR-572       |  |
| hsa-miR-450a-2-3p |  |
| hsa-miR-6089      |  |
| hsa-miR-760       |  |
| hsa-miR-3944-5p   |  |
| hsa-miR-7110-5p   |  |
| hsa-miR-4518      |  |

|                  |  |
|------------------|--|
| hsa-miR-3153     |  |
| hsa-miR-641      |  |
| hsa-miR-8069     |  |
| hsa-miR-659-3p   |  |
| hsa-miR-3665     |  |
| hsa-miR-6083     |  |
| hsa-miR-433-5p   |  |
| hsa-miR-4488     |  |
| hsa-miR-148b-3p  |  |
| hsa-miR-921      |  |
| hsa-miR-2113     |  |
| hsa-miR-30d-5p   |  |
| hsa-miR-101-3p   |  |
| hsa-miR-6785-5p  |  |
| hsa-miR-3195     |  |
| hsa-miR-30a-3p   |  |
| hsa-miR-1469     |  |
| hsa-miR-4744     |  |
| hsa-miR-4310     |  |
| hsa-miR-548j-5p  |  |
| hsa-miR-8071     |  |
| hsa-miR-663a     |  |
| hsa-miR-6777-3p  |  |
| hsa-miR-3200-5p  |  |
| hsa-miR-668-3p   |  |
| hsa-miR-1273c    |  |
| hsa-miR-4516     |  |
| hsa-miR-6132     |  |
| hsa-miR-6738-5p  |  |
| hsa-miR-6812-5p  |  |
| hsa-miR-3960     |  |
| hsa-miR-4435     |  |
| hsa-miR-30e-3p   |  |
| hsa-miR-4666a-5p |  |
| hsa-miR-3656     |  |
| hsa-miR-6873-3p  |  |
| hsa-miR-5787     |  |
| hsa-miR-410-3p   |  |
| hsa-miR-4497     |  |
| hsa-miR-3614-3p  |  |
| hsa-miR-1268b    |  |
| hsa-miR-4466     |  |
| hsa-miR-433-3p   |  |
| hsa-miR-6736-5p  |  |
| hsa-miR-4286     |  |
| hsa-miR-4745-5p  |  |
| hsa-miR-4638-5p  |  |
| hsa-miR-199b-5p  |  |

|                 |  |
|-----------------|--|
| hsa-miR-4492    |  |
| hsa-miR-7853-5p |  |
| hsa-miR-338-3p  |  |
| hsa-miR-4281    |  |
| hsa-miR-3621    |  |
| hsa-miR-370-3p  |  |
| hsa-miR-15b-5p  |  |
| hsa-miR-5197-3p |  |
| hsa-miR-6803-5p |  |
| hsa-miR-4316    |  |
| hsa-miR-383-3p  |  |
| hsa-miR-6776-3p |  |
| hsa-miR-4508    |  |
| hsa-miR-4674    |  |
| hsa-miR-6509-5p |  |
